# Supplementary material
Source: PubMed Central journal article supplement (PMC8652827)
Supplement: IJC-150-782-s001.pdf [file IJC-150-782-s001.pdf]

# Cancer and the risk of COVID-19 diagnosis, hospitalisation, and death: a population-based multi-state cohort study including 4,618,377 adults in Catalonia, Spain

Elena Roel, Andrea Pistillo, Martina Recalde, Sergio Fernández-Bertolín, María Aragón, Isabelle Soerjomataram, Mazda Jenab, Diana Puente, Daniel Prieto-Alhambra, Edward Burn, Talita Duarte-Salles\*

## Supplementary material

### Supplementary tables

|                                                                                                                                                                                                                |    |
|----------------------------------------------------------------------------------------------------------------------------------------------------------------------------------------------------------------|----|
| Table S1. Descriptive characteristics of the population included, by state and transition                                                                                                                      | 3  |
| Table S2. Adjusted Hazard Ratios of COVID-19 outcomes in patients with cancer (overall and by years since cancer diagnosis) compared to patients without cancer, stratified by sex.                            | 7  |
| Table S3. Adjusted Hazard Ratios of COVID-19 outcomes in patients with cancer (overall and by years since cancer diagnosis) compared to patients without cancer, stratified by age.                            | 8  |
| Table S4. Adjusted Hazard Ratios of COVID-19 outcomes in patients with cancer (overall and by years since cancer diagnosis) compared to patients without cancer, stratified by solid or haematological cancer. | 9  |
| Table S5. Adjusted Hazard Ratios of COVID-19 outcomes in patients with cancer (overall and by years since cancer diagnosis) compared to patients without cancer, stratified by solid cancer type.              | 10 |
| Table S6. Comparison of baseline characteristics among individuals with complete information on all covariates vs individuals with missing information on the MEDEA deprivation index and/or smoking status.   | 12 |

|                                                                                                                                                                                                                    |    |
|--------------------------------------------------------------------------------------------------------------------------------------------------------------------------------------------------------------------|----|
| <b>Supplementary figures</b>                                                                                                                                                                                       | 15 |
| Figure S1. Directed Acyclic Graph used to adjust the Cox proportional hazard models to assess the relationship between cancer and COVID-19 outcomes                                                                | 15 |
| Figure S2. Flowchart with the inclusion and exclusion criteria of the study population                                                                                                                             | 16 |
| Figure S3. Prevalence of comorbidities among the general population, by age and cancer status                                                                                                                      | 17 |
| Figure S4. Hazard Ratios of COVID-19 outcomes in patients with cancer compared to patients without cancer, using different adjustment strategies.                                                                  | 18 |
| Figure S5. Log-log plots for risk of having an outpatient COVID-19 diagnosis, for age categories (A) and for cancer status by years since cancer diagnosis (B)                                                     | 19 |
| Figure S6. Adjusted Hazard Ratios for having an outpatient COVID-19 diagnosis in patients with cancer (overall and by years since the cancer diagnosis) compared to patients without cancer, stratified by month   | 21 |
| Figure S7. Adjusted Hazard Ratios of COVID-19 outcomes in patients with cancer compared to patients without cancer, by population included (all and restricting participants to never smokers)                     | 22 |
| Figure S8. Adjusted Hazard Ratios of COVID-19 outcomes in patients with cancer compared to patients without cancer, after multiple imputation of missing data on the MEDEA deprivation index and/or smoking status | 23 |

## Supplementary tables

**Table S1. Descriptive characteristics of the population included, by state and transition**

|                                    | Among general population |                         |                            |                 | Among diagnosed with COVID-19 |                 | Among hospitalised with COVID-19 |
|------------------------------------|--------------------------|-------------------------|----------------------------|-----------------|-------------------------------|-----------------|----------------------------------|
|                                    | General population       | Diagnosed with COVID-19 | Hospitalised with COVID-19 | Death           | Hospitalised with COVID-19    | Death           | Death                            |
| n                                  | 4,618,377                | 98,951                  | 6,355                      | 11,326          | 6,851                         | 3,227           | 1,963                            |
| <b>Age, in years [IQR]</b>         | 48 [36.0, 63.0]          | 47 [37.0, 59.0]         | 71 [59.0, 80.0]            | 85 [76.0, 90.0] | 60 [50.0, 73.0]               | 86 [79.0, 91.0] | 80 [73.0, 86.0]                  |
| <b>Age, categories (%)</b>         |                          |                         |                            |                 |                               |                 |                                  |
| 18 to 39 years                     | 1,437,236 (31.1)         | 30,648 (31.0)           | 307 (4.8)                  | 79 (0.7)        | 665 (9.7)                     | 10 (0.3)        | 7 (0.4)                          |
| 40 to 59 years                     | 1,785,495 (38.7)         | 44,909 (45.4)           | 1,355 (21.3)               | 650 (5.7)       | 2,665 (38.9)                  | 112 (3.5)       | 91 (4.6)                         |
| 60 to 69 years                     | 615,198 (13.3)           | 10,602 (10.7)           | 1,223 (19.2)               | 1,022 (9.0)     | 1,304 (19.0)                  | 203 (6.3)       | 210 (10.7)                       |
| 70 to 79 years                     | 468,286 (10.1)           | 6,419 (6.5)             | 1,825 (28.7)               | 1,969 (17.4)    | 1,316 (19.2)                  | 571 (17.7)      | 636 (32.4)                       |
| 80 or older years                  | 312,162 (6.8)            | 6,373 (6.4)             | 1,645 (25.9)               | 7,606 (67.2)    | 901 (13.2)                    | 2,331 (72.2)    | 1,019 (51.9)                     |
| <b>Sex, female (%)</b>             | 2,361,230 (51.1)         | 57,507 (58.1)           | 2,705 (42.6)               | 5,679 (50.1)    | 3,067 (44.8)                  | 1,734 (53.7)    | 769 (39.2)                       |
| <b>MEDEA Deprivation Index (%)</b> |                          |                         |                            |                 |                               |                 |                                  |
| Quintile 1 (least deprived)        | 714,183 (15.5)           | 14,873 (15.0)           | 815 (12.8)                 | 1,272 (11.2)    | 876 (12.8)                    | 436 (13.5)      | 206 (10.5)                       |
| Quintile 2                         | 703,921 (15.2)           | 15,349 (15.5)           | 936 (14.7)                 | 1,112 (9.8)     | 1,043 (15.2)                  | 281 (8.7)       | 192 (9.8)                        |
| Quintile 3                         | 697,074 (15.1)           | 15,564 (15.7)           | 1,026 (16.1)               | 1,106 (9.8)     | 1,215 (17.7)                  | 344 (10.7)      | 253 (12.9)                       |

|                                                                              |                  |               |              |              |              |              |              |
|------------------------------------------------------------------------------|------------------|---------------|--------------|--------------|--------------|--------------|--------------|
| Quintile 4                                                                   | 692,844 (15.0)   | 15,774 (15.9) | 1,107 (17.4) | 1,014 (9.0)  | 1,205 (17.6) | 222 (6.9)    | 228 (11.6)   |
| Quintile 5 (most deprived)                                                   | 687,062 (14.9)   | 15,134 (15.3) | 1,097 (17.3) | 896 (7.9)    | 1,184 (17.3) | 204 (6.3)    | 195 (9.9)    |
| Rural                                                                        | 832,256 (18.0)   | 14,670 (14.8) | 650 (10.2)   | 2,271 (20.1) | 753 (11.0)   | 658 (20.4)   | 206 (10.5)   |
| Missing                                                                      | 291,037 (6.3)    | 7,587 (7.7)   | 724 (11.4)   | 3,655 (32.3) | 575 (8.4)    | 1,082 (33.5) | 683 (34.8)   |
| <b>Smoking status (%)</b>                                                    |                  |               |              |              |              |              |              |
| Never smoker                                                                 | 1,834,657 (39.7) | 42,353 (42.8) | 2,548 (40.1) | 3,967 (35.0) | 3,026 (44.2) | 1,220 (37.8) | 669 (34.1)   |
| Former smoker                                                                | 772,875 (16.7)   | 19,340 (19.5) | 2,089 (32.9) | 3,436 (30.3) | 1,901 (27.7) | 1,020 (31.6) | 730 (37.2)   |
| Current smoker                                                               | 712,739 (15.4)   | 13,820 (14.0) | 302 (4.8)    | 839 (7.4)    | 334 (4.9)    | 132 (4.1)    | 68 (3.5)     |
| Missing                                                                      | 1,298,106 (28.1) | 23,438 (23.7) | 1,416 (22.3) | 3,084 (27.2) | 1,590 (23.2) | 855 (26.5)   | 496 (25.3)   |
| <b>Comorbidities (%)</b>                                                     |                  |               |              |              |              |              |              |
| Autoimmune condition                                                         | 259,234 (5.6)    | 6,322 (6.4)   | 632 (9.9)    | 1,292 (11.4) | 586 (8.6)    | 346 (10.7)   | 244 (12.4)   |
| Chronic kidney disease                                                       | 201,258 (4.4)    | 4,167 (4.2)   | 1,137 (17.9) | 3,708 (32.7) | 675 (9.9)    | 1,076 (33.3) | 616 (31.4)   |
| Chronic obstructive pulmonary disease                                        | 119,532 (2.6)    | 2,476 (2.5)   | 596 (9.4)    | 1,457 (12.9) | 344 (5.0)    | 342 (10.6)   | 271 (13.8)   |
| Dementia                                                                     | 42,504 (0.9)     | 2,011 (2.0)   | 334 (5.3)    | 2,707 (23.9) | 200 (2.9)    | 1,094 (33.9) | 261 (13.3)   |
| Heart disease                                                                | 516,140 (11.2)   | 11,076 (11.2) | 2,091 (32.9) | 5,700 (50.3) | 1,456 (21.3) | 1,470 (45.6) | 982 (50.0)   |
| Hyperlipidaemia                                                              | 505,102 (10.9)   | 11,015 (11.1) | 1,215 (19.1) | 1,581 (14.0) | 1,189 (17.4) | 480 (14.9)   | 389 (19.8)   |
| Hypertension                                                                 | 687,358 (14.9)   | 14,149 (14.3) | 1,947 (30.6) | 3,831 (33.8) | 1,725 (25.2) | 1,115 (34.6) | 694 (35.4)   |
| Obesity                                                                      | 1,144,442 (24.8) | 27,840 (28.1) | 3,197 (50.3) | 4,863 (42.9) | 3,014 (44.0) | 1,467 (45.5) | 1,031 (52.5) |
| Type 2 diabetes                                                              | 317,005 (6.9)    | 6,239 (6.3)   | 1,354 (21.3) | 2,608 (23.0) | 1,004 (14.7) | 741 (23.0)   | 541 (27.6)   |
| <b>Without a prior diagnosis of cancer (%)</b>                               | 4,357,710 (94.4) | 93,558 (94.5) | 5,312 (83.6) | 7,970 (70.4) | 6,116 (89.3) | 2,631 (81.5) | 1,522 (77.5) |
| <b>With a prior diagnosis of cancer, by years since cancer diagnosis (%)</b> |                  |               |              |              |              |              |              |

|                                         |               |             |            |              |           |            |            |
|-----------------------------------------|---------------|-------------|------------|--------------|-----------|------------|------------|
| ≥5 years*                               | 167,053 (3.6) | 3,464 (3.5) | 670 (10.5) | 1,714 (15.1) | 464 (6.8) | 379 (11.7) | 293 (14.9) |
| 1-5 years*                              | 72,033 (1.6)  | 1,466 (1.5) | 268 (4.2)  | 911 (8.0)    | 211 (3.1) | 149 (4.6)  | 110 (5.6)  |
| <1 year*                                | 21,581 (0.5)  | 463 (0.5)   | 105 (1.7)  | 731 (6.5)    | 60 (0.9)  | 68 (2.1)   | 38 (1.9)   |
| <b>Cancer type [ICD-10-CM code] (%)</b> |               |             |            |              |           |            |            |
| <b>Haematological</b>                   | 21,637 (0.5)  | 513 (0.5)   | 135 (2.1)  | 268 (2.4)    | 80 (1.2)  | 64 (2.0)   | 53 (2.7)   |
| Leukaemia [C91-C95]                     | 5,111 (0.1)   | 127 (0.1)   | 24 (0.4)   | 32 (0.3)     | 14 (0.2)  | 9 (0.3)    | 6 (0.3)    |
| Non-Hodgkin lymphoma [C82-C96]          | 7,402 (0.2)   | 175 (0.2)   | 57 (0.9)   | 109 (1.0)    | 32 (0.5)  | 37 (1.1)   | 27 (1.4)   |
| Hodgkin's lymphoma [C81]                | 2,249 (0.0)   | 48 (0.0)    | 24 (0.4)   | 66 (0.6)     | 7 (0.1)   | 7 (0.2)    | 9 (0.5)    |
| Multiple myeloma [C90]                  | 2,724 (0.1)   | 60 (0.1)    | 6 (0.1)    | 4 (0.0)      | 8 (0.1)   | 0 (0.0)    | 2 (0.1)    |
| Other haematological [C96]              | 4,151 (0.1)   | 103 (0.1)   | 24 (0.4)   | 57 (0.5)     | 19 (0.3)  | 11 (0.3)   | 9 (0.5)    |
| <b>Solid</b>                            | 239,030 (5.2) | 4,880 (4.9) | 908 (14.3) | 3,088 (27.3) | 655 (9.6) | 532 (16.5) | 388 (19.8) |
| Breast [C50]                            | 58,611 (1.3)  | 1,236 (1.2) | 148 (2.3)  | 402 (3.5)    | 117 (1.7) | 96 (3.0)   | 46 (2.3)   |
| Prostate [C61]                          | 37,141 (0.8)  | 682 (0.7)   | 186 (2.9)  | 440 (3.9)    | 122 (1.8) | 103 (3.2)  | 87 (4.4)   |
| Colorectal [C18-C21]                    | 36,071 (0.8)  | 687 (0.7)   | 170 (2.7)  | 539 (4.8)    | 121 (1.8) | 108 (3.3)  | 82 (4.2)   |
| Bladder [C67]                           | 20,592 (0.4)  | 421 (0.4)   | 132 (2.1)  | 350 (3.1)    | 61 (0.9)  | 64 (2.0)   | 56 (2.9)   |
| Skin melanoma [C43]                     | 7,569 (0.2)   | 140 (0.1)   | 42 (0.7)   | 314 (2.8)    | 20 (0.3)  | 19 (0.6)   | 18 (0.9)   |
| Kidney [C64]                            | 7,353 (0.2)   | 162 (0.2)   | 22 (0.3)   | 64 (0.6)     | 27 (0.4)  | 14 (0.4)   | 8 (0.4)    |
| Lung [C33-C34]                          | 7,911 (0.2)   | 159 (0.2)   | 28 (0.4)   | 92 (0.8)     | 27 (0.4)  | 17 (0.5)   | 15 (0.8)   |
| Corpus uterus [C54-C55]                 | 12,956 (0.3)  | 291 (0.3)   | 38 (0.6)   | 74 (0.7)     | 33 (0.5)  | 14 (0.4)   | 20 (1.0)   |
| Thyroid [C73]                           | 6,449 (0.1)   | 186 (0.2)   | 12 (0.2)   | 12 (0.1)     | 14 (0.2)  | 4 (0.1)    | 4 (0.2)    |

|                                                         |               |            |           |            |           |          |          |
|---------------------------------------------------------|---------------|------------|-----------|------------|-----------|----------|----------|
| Head and neck [C00-C14]                                 | 5,770 (0.1)   | 106 (0.1)  | 21 (0.3)  | 71 (0.6)   | 10 (0.1)  | 9 (0.3)  | 8 (0.4)  |
| Cervix [C53]                                            | 3,313 (0.1)   | 81 (0.1)   | 6 (0.1)   | 72 (0.6)   | 7 (0.1)   | 5 (0.2)  | 4 (0.2)  |
| Ovary [C56]                                             | 3,628 (0.1)   | 64 (0.1)   | 10 (0.2)  | 80 (0.7)   | 8 (0.1)   | 15 (0.5) | 3 (0.2)  |
| Stomach [C16]                                           | 3,889 (0.1)   | 82 (0.1)   | 6 (0.1)   | 39 (0.3)   | 9 (0.1)   | 11 (0.3) | 5 (0.3)  |
| Larynx [C32]                                            | 3,317 (0.1)   | 46 (0.0)   | 18 (0.3)  | 66 (0.6)   | 8 (0.1)   | 5 (0.2)  | 8 (0.4)  |
| Brain and Central Nervous System [C70-C72, C75.1-C75.3] | 2,051 (0.0)   | 37 (0.0)   | 8 (0.1)   | 97 (0.9)   | 6 (0.1)   | 2 (0.1)  | 3 (0.2)  |
| Testis [C62]                                            | 3,979 (0.1)   | 108 (0.1)  | 4 (0.1)   | 25 (0.2)   | 8 (0.1)   | 2 (0.1)  | 2 (0.1)  |
| Liver [C22]                                             | 1,622 (0.0)   | 43 (0.0)   | 11 (0.2)  | 98 (0.9)   | 7 (0.1)   | 9 (0.3)  | 1 (0.1)  |
| Bone and cartilage [C40-C41]                            | 763 (0.0)     | 15 (0.0)   | 6 (0.1)   | 41 (0.4)   | 2 (0.0)   | 8 (0.2)  | 2 (0.1)  |
| Pancreas [C25]                                          | 479 (0.0)     | 19 (0.0)   | 3 (0.0)   | 23 (0.2)   | 4 (0.1)   | 2 (0.1)  | 2 (0.1)  |
| Oesophagus [C15]                                        | 2,763 (0.1)   | 51 (0.1)   | 0 (0.0)   | 1 (0.0)    | 1 (0.0)   | 1 (0.0)  | 0 (0.0)  |
| Gallbladder [C23-C24]                                   | 1,944 (0.0)   | 43 (0.0)   | 1 (0.0)   | 15 (0.1)   | 8 (0.1)   | 2 (0.1)  | 1 (0.1)  |
| Other solid cancers                                     | 10,859 (0.2%) | 221 (0.2%) | 36 (0.6%) | 173 (1.5%) | 35 (0.5%) | 22(0.7%) | 13(0.7%) |

Notes: \* Years since cancer diagnosis to the index date (1 March 2020). The MEDEA deprivation index is calculated at the census tract level in urban areas. Other solid cancers include other solid cancers, cancers of unspecified site [C76, C80] and more than one cancer (i.e. patients that had more than one cancer recorded on the same date). Abbreviations: IQR, interquartile range; ICD-10-CM, International Classification for Diseases, 10th revision Clinical Modification

**Table S2. Adjusted Hazard Ratios of COVID-19 outcomes in patients with cancer (overall and by years since cancer diagnosis) compared to patients without cancer, stratified by sex.**

| Transition                 |                            | Sex    | aHR (95% CI) in patients with cancer |                     |                     |                     |
|----------------------------|----------------------------|--------|--------------------------------------|---------------------|---------------------|---------------------|
| From                       | To                         |        | Overall                              | ≥5 years*           | 1-5 years*          | <1 year*            |
| General population         | Diagnosed with COVID-19    | Female | 1.05 (1.01 to 1.09)                  | 1.08 (1.03 to 1.13) | 1.00 (0.93 to 1.08) | 0.91 (0.79 to 1.04) |
|                            |                            | Male   | 1.08 (1.03 to 1.12)                  | 1.05 (1.00 to 1.11) | 1.05 (0.97 to 1.13) | 1.33 (1.17 to 1.50) |
|                            | Hospitalised with COVID-19 | Female | 1.41 (1.26 to 1.58)                  | 1.23 (1.08 to 1.42) | 1.68 (1.38 to 2.04) | 2.24 (1.64 to 3.06) |
|                            |                            | Male   | 1.26 (1.15 to 1.38)                  | 1.26 (1.13 to 1.40) | 1.13 (0.96 to 1.32) | 1.62 (1.27 to 2.07) |
| Diagnosed with COVID-19    | Hospitalised with COVID-19 | Female | 1.16 (1.03 to 1.31)                  | 1.10 (0.95 to 1.28) | 1.39 (1.12 to 1.72) | 0.88 (0.54 to 1.44) |
|                            |                            | Male   | 1.05 (0.95 to 1.17)                  | 1.03 (0.90 to 1.17) | 1.09 (0.91 to 1.31) | 1.07 (0.79 to 1.44) |
|                            | Death                      | Female | 0.96 (0.83 to 1.10)                  | 0.87 (0.74 to 1.03) | 1.12 (0.86 to 1.46) | 1.30 (0.86 to 1.97) |
|                            |                            | Male   | 1.12 (0.99 to 1.27)                  | 0.98 (0.85 to 1.14) | 1.15 (0.93 to 1.43) | 2.23 (1.65 to 3.01) |
| Hospitalised with COVID-19 | Death                      | Female | 1.09 (0.90 to 1.30)                  | 0.97 (0.78 to 1.21) | 1.26 (0.90 to 1.78) | 1.73 (1.03 to 2.90) |
|                            |                            | Male   | 1.12 (0.98 to 1.28)                  | 1.08 (0.93 to 1.27) | 1.12 (0.88 to 1.42) | 1.47 (0.96 to 2.23) |

Notes: \* Years since cancer diagnosis to the index date (1 March 2020). Models are adjusted for age, the MEDEA deprivation index, smoking status, and comorbidities (autoimmune conditions, chronic kidney disease, chronic obstructive pulmonary disease, dementia, heart disease, hyperlipidaemia, hypertension, type 2 diabetes, and obesity). Abbreviations: aHR, adjusted Hazard Ratio; CI, Confidence Interval

**Table S3. Adjusted Hazard Ratios of COVID-19 outcomes in patients with cancer (overall and by years since cancer diagnosis) compared to patients without cancer, stratified by age.**

| Transition                 |                            | Age       | aHR (95% CI) in patients with cancer |                     |                     |                       |
|----------------------------|----------------------------|-----------|--------------------------------------|---------------------|---------------------|-----------------------|
| From                       | To                         |           | Overall                              | ≥5 years*           | 1-5 years*          | <1 year*              |
| General population         | Diagnosed with COVID-19    | <70 years | 0.96 (0.93 to 1.00)                  | 0.97 (0.92 to 1.02) | 0.95 (0.89 to 1.01) | 0.92 (0.81 to 1.04)   |
|                            |                            | ≥70 years | 1.12 (1.07 to 1.17)                  | 1.11 (1.05 to 1.16) | 1.09 (1.00 to 1.19) | 1.39 (1.21 to 1.61)   |
|                            | Hospitalised with COVID-19 | <70 years | 1.56 (1.37 to 1.77)                  | 1.48 (1.26 to 1.74) | 1.42 (1.14 to 1.77) | 2.37 (1.74 to 3.25)   |
|                            |                            | ≥70 years | 1.21 (1.11 to 1.31)                  | 1.16 (1.06 to 1.28) | 1.24 (1.06 to 1.43) | 1.55 (1.21 to 1.99)   |
| Diagnosed with COVID-19    | Hospitalised with COVID-19 | <70 years | 1.09 (0.97 to 1.24)                  | 1.03 (0.87 to 1.21) | 1.13 (0.92 to 1.40) | 1.34 (0.94 to 1.89)   |
|                            |                            | ≥70 years | 1.07 (0.96 to 1.18)                  | 1.05 (0.93 to 1.19) | 1.22 (1.01 to 1.47) | 0.75 (0.51 to 1.08)   |
|                            | Death                      | <70 years | 2.97 (2.25 to 3.92)                  | 1.39 (0.86 to 2.24) | 3.44 (2.31 to 5.13) | 10.81 (6.83 to 17.12) |
|                            |                            | ≥70 years | 0.97 (0.88 to 1.06)                  | 0.92 (0.83 to 1.03) | 1.02 (0.85 to 1.23) | 1.29 (0.96 to 1.72)   |
| Hospitalised with COVID-19 | Death                      | <70 years | 1.49 (1.10 to 2.01)                  | 1.32 (0.90 to 1.92) | 1.17 (0.65 to 2.10) | 4.58 (2.47 to 8.50)   |
|                            |                            | ≥70 years | 1.07 (0.95 to 1.20)                  | 1.01 (0.89 to 1.16) | 1.16 (0.94 to 1.43) | 1.30 (0.88 to 1.90)   |

Notes: \* Years since cancer diagnosis to the index date (1 March 2020). Models are adjusted for sex, age, the MEDEA deprivation Index, smoking status, and comorbidities (autoimmune conditions, chronic kidney disease, chronic obstructive pulmonary disease, dementia, heart disease, hyperlipidaemia, hypertension, type 2 diabetes, and obesity). Abbreviations: aHR, adjusted Hazard Ratio; CI, Confidence Interval



**Table S4. Adjusted Hazard Ratios of COVID-19 outcomes in patients with cancer (overall and by years since cancer diagnosis) compared to patients without cancer, stratified by solid or haematological cancer.**

| Transition                 |                            | Cancer type, number of events (overall) | aHR (95% CI) in patients with cancer |                     |                     |                     |
|----------------------------|----------------------------|-----------------------------------------|--------------------------------------|---------------------|---------------------|---------------------|
| From                       | To                         |                                         | Overall                              | ≥5 years*           | 1-5 years*          | <1 year*            |
| General population         | Diagnosed with COVID-19    | Haematological, n=513                   | 1.20 (1.10 to 1.31)                  | 1.12 (1.00 to 1.25) | 1.23 (1.05 to 1.45) | 1.77 (1.38 to 2.28) |
|                            |                            | Solid, n=4,880                          | 1.07 (1.04 to 1.11)                  | 1.09 (1.05 to 1.13) | 1.03 (0.98 to 1.09) | 1.07 (0.97 to 1.18) |
|                            | Hospitalised with COVID-19 | Haematological, n=135                   | 2.51 (2.12 to 2.98)                  | 2.01 (1.57 to 2.56) | 2.61 (1.92 to 3.53) | 6.18 (4.31 to 8.86) |
|                            |                            | Solid, n=908                            | 1.24 (1.15 to 1.33)                  | 1.21 (1.11 to 1.32) | 1.21 (1.06 to 1.39) | 1.49 (1.19 to 1.87) |
| Diagnosed with COVID-19    | Hospitalised with COVID-19 | Haematological, n=80                    | 1.37 (1.10 to 1.71)                  | 0.96 (0.68 to 1.36) | 1.85 (1.31 to 2.60) | 2.24 (1.34 to 3.76) |
|                            |                            | Solid, n=655                            | 1.05 (0.97 to 1.14)                  | 1.05 (0.95 to 1.16) | 1.12 (0.96 to 1.30) | 0.85 (0.64 to 1.14) |
|                            | Death                      | Haematological, n=64                    | 1.08 (0.84 to 1.39)                  | 1.02 (0.72 to 1.43) | 0.89 (0.57 to 1.38) | 3.11 (1.67 to 5.81) |
|                            |                            | Solid, n=532                            | 1.03 (0.94 to 1.13)                  | 0.91 (0.82 to 1.02) | 1.20 (1.00 to 1.44) | 1.69 (1.30 to 2.19) |
| Hospitalised with COVID-19 | Death                      | Haematological, n=53                    | 1.73 (1.31 to 2.28)                  | 1.55 (1.04 to 2.31) | 1.92 (1.24 to 2.99) | 1.92 (0.96 to 3.86) |
|                            |                            | Solid, n=388                            | 1.07 (0.96 to 1.20)                  | 1.03 (0.90 to 1.17) | 1.07 (0.86 to 1.32) | 1.56 (1.09 to 2.25) |

Notes: \* Years since cancer diagnosis to the index date (1 March 2020). Models for specific cancer types include patients without cancer and patients with the cancer type of interest. Models are adjusted for sex, age, the MEDEA deprivation Index, smoking status, and comorbidities (autoimmune conditions, chronic kidney disease, chronic obstructive pulmonary disease, dementia, heart disease, hyperlipidaemia, hypertension, type 2 diabetes, and obesity). Abbreviations: aHR, adjusted Hazard Ratio; CI, Confidence Interval

**Table S5. Adjusted Hazard Ratios of COVID-19 outcomes in patients with cancer (overall and by years since cancer diagnosis) compared to patients without cancer, stratified by solid cancer type.**

| Transition              |                            | Solid cancer type,<br>number of events<br>(overall) | aHR (95% CI) in patients with cancer |                     |                     |
|-------------------------|----------------------------|-----------------------------------------------------|--------------------------------------|---------------------|---------------------|
| From                    | To                         |                                                     | Overall                              | ≥5 years*           | <5 years*           |
| General population      | Diagnosed with COVID-19    | Breast n=1,236                                      | 1.00 (0.95 to 1.06)                  | 1.04 (0.97 to 1.12) | 0.93 (0.85 to 1.03) |
|                         |                            | Prostate, n=682                                     | 1.05 (0.97 to 1.14)                  | 1.08 (0.99 to 1.19) | 0.99 (0.86 to 1.13) |
|                         |                            | Colorectal, n=687                                   | 1.07 (1.00 to 1.16)                  | 1.09 (0.99 to 1.20) | 1.05 (0.93 to 1.19) |
|                         |                            | Bladder, n=421                                      | 1.22 (1.11 to 1.35)                  | 1.25 (1.10 to 1.41) | 1.19 (1.02 to 1.39) |
|                         |                            | Lung, n= 140                                        | 1.02 (0.86 to 1.20)                  | 0.99 (0.76 to 1.28) | 1.03 (0.83 to 1.28) |
|                         | Hospitalised with COVID-19 | Breast, n=148                                       | 1.30 (1.10 to 1.54)                  | 1.10 (0.89 to 1.36) | 1.87 (1.43 to 2.45) |
|                         |                            | Prostate, n=186                                     | 0.99 (0.85 to 1.16)                  | 1.09 (0.92 to 1.30) | 0.75 (0.55 to 1.03) |
|                         |                            | Colorectal, n=170                                   | 1.28 (1.10 to 1.49)                  | 1.27 (1.04 to 1.53) | 1.30 (1.01 to 1.67) |
|                         |                            | Bladder, n=132                                      | 1.50 (1.26 to 1.79)                  | 1.47 (1.18 to 1.83) | 1.55 (1.17 to 2.06) |
|                         |                            | Lung, n=42                                          | 1.53 (1.13 to 2.08)                  | 1.35 (0.84 to 2.18) | 1.69 (1.14 to 2.51) |
| Diagnosed with COVID-19 | Hospitalised with COVID-19 | Breast, n=117                                       | 1.06 (0.87 to 1.27)                  | 1.04 (0.83 to 1.29) | 1.12 (0.79 to 1.56) |
|                         |                            | Prostate, n=122                                     | 0.91 (0.76 to 1.10)                  | 0.93 (0.75 to 1.15) | 0.88 (0.63 to 1.23) |
|                         |                            | Colorectal, n=121                                   | 1.14 (0.95 to 1.37)                  | 1.17 (0.93 to 1.48) | 1.09 (0.81 to 1.47) |
|                         |                            | Bladder, n=61                                       | 0.85 (0.66 to 1.09)                  | 0.89 (0.65 to 1.21) | 0.78 (0.51 to 1.20) |
|                         |                            | Lung, n=20                                          | 1.03 (0.66 to 1.60)                  | 1.54 (0.87 to 2.70) | 0.60 (0.29 to 1.27) |
|                         | Death                      | Breast, n=96                                        | 1.08 (0.88 to 1.33)                  | 0.99 (0.78 to 1.26) | 1.41 (0.97 to 2.05) |
|                         |                            | Prostate, n=103                                     | 0.84 (0.68 to 1.02)                  | 0.76 (0.60 to 0.96) | 1.17 (0.79 to 1.71) |
|                         |                            | Colorectal, n=108                                   | 1.03 (0.85 to 1.26)                  | 0.87 (0.68 to 1.11) | 1.48 (1.09 to 2.01) |

|                            |       |                  |                     |                     |                     |
|----------------------------|-------|------------------|---------------------|---------------------|---------------------|
|                            |       | Bladder, n=64    | 1.05 (0.82 to 1.35) | 1.22 (0.91 to 1.65) | 0.80 (0.51 to 1.25) |
|                            |       | Lung, n=19       | 1.68 (1.06 to 2.64) | 0.96 (0.43 to 2.14) | 2.57 (1.49 to 4.46) |
| Hospitalised with COVID-19 | Death | Breast, n=46     | 0.88 (0.65 to 1.20) | 0.73 (0.50 to 1.08) | 1.28 (0.80 to 2.06) |
|                            |       | Prostate, n=87   | 1.02 (0.82 to 1.28) | 1.01 (0.78 to 1.29) | 1.11 (0.70 to 1.78) |
|                            |       | Colorectal, n=82 | 1.07 (0.85 to 1.34) | 1.10 (0.85 to 1.43) | 0.98 (0.64 to 1.49) |
|                            |       | Bladder, n=56    | 1.14 (0.87 to 1.50) | 0.95 (0.67 to 1.33) | 1.70 (1.11 to 2.60) |
|                            |       | Lung, n=18       | 1.04 (0.65 to 1.67) | 1.46 (0.75 to 2.84) | 0.81 (0.42 to 1.57) |

Notes: \* Years since cancer diagnosis to the index date (1 March 2020). Models for specific cancer types include patients without cancer and patients with the cancer type of interest; models for breast and prostate cancer include only females and males, respectively. Models are adjusted for sex, age, the MEDEA deprivation index, smoking status, and comorbidities (autoimmune conditions, chronic kidney disease, chronic obstructive pulmonary disease, dementia, heart disease, hyperlipidaemia, hypertension, type 2 diabetes, and obesity). Abbreviations: aHR, adjusted Hazard Ratio; CI, Confidence Interval

**Table S6. Comparison of baseline characteristics among individuals with complete information on all covariates vs individuals with missing information on the MEDEA deprivation index and/or smoking status.**

|                                       | <b>With complete information on covariates</b> | <b>Without MEDEA or smoking status</b> | <b>Standardized Mean Difference</b> |
|---------------------------------------|------------------------------------------------|----------------------------------------|-------------------------------------|
| n                                     | 3,115,935                                      | 1,502,442                              |                                     |
| Age, median [IQR]                     | 49 [36.0, 64.0]                                | 47 [36.0, 61.0]                        | 0.063                               |
| <b>Age, categories (%)</b>            |                                                |                                        | 0.133                               |
| 18 to 39                              | 959,224 (30.8)                                 | 478,012 (31.8)                         |                                     |
| 40 to 59                              | 1,161,860 (37.3)                               | 623,635 (41.5)                         |                                     |
| 60 to 69                              | 444,882 (14.3)                                 | 170,316 (11.3)                         |                                     |
| 70 to 79                              | 340,542 (10.9)                                 | 127,744 (8.5)                          |                                     |
| 80 or older                           | 209,427 (6.7)                                  | 102,735 (6.8)                          |                                     |
| <b>Sex, female (%)</b>                | 1,639,430 (52.6)                               | 721,800 (48.0)                         | 0.092                               |
| <b>MEDEA Deprivation Index (%)</b>    |                                                |                                        | 0.696                               |
| Quintile 1 (least deprived)           | 499,651 (16.0)                                 | 214,532 (14.3)                         |                                     |
| Quintile 2                            | 501,888 (16.1)                                 | 202,033 (13.4)                         |                                     |
| Quintile 3                            | 501,880 (16.1)                                 | 195,194 (13.0)                         |                                     |
| Quintile 4                            | 501,959 (16.1)                                 | 190,885 (12.7)                         |                                     |
| Quintile 5 (most deprived)            | 501,993 (16.1)                                 | 185,069 (12.3)                         |                                     |
| Rural                                 | 608,564 (19.5)                                 | 223,692 (14.9)                         |                                     |
| Missing                               | 0 (0.0)                                        | 291,037 (19.4)                         |                                     |
| <b>Smoking status (%)</b>             |                                                |                                        | 3.565                               |
| Never smoker                          | 1,724,016 (55.3)                               | 110,641 (7.4)                          |                                     |
| Former smoker                         | 725,290 (23.3)                                 | 47,585 (3.2)                           |                                     |
| Current smoker                        | 666,629 (21.4)                                 | 46,110 (3.1)                           |                                     |
| Missing                               | 0 (0.0)                                        | 1,298,106 (86.4)                       |                                     |
| <b>Comorbidities</b>                  |                                                |                                        |                                     |
| Autoimmune condition                  | 191,028 (6.1)                                  | 68,206 (4.5)                           | 0.071                               |
| Chronic kidney disease                | 145,800 (4.7)                                  | 55,458 (3.7)                           | 0.049                               |
| Chronic obstructive pulmonary disease | 89,240 (2.9)                                   | 30,292 (2.0)                           | 0.055                               |
| Dementia                              | 28,197 (0.9)                                   | 14,307 (1.0)                           | 0.005                               |
| Heart disease                         | 382,684 (12.3)                                 | 133,456 (8.9)                          | 0.111                               |
| Hyperlipidaemia                       | 386,108 (12.4)                                 | 118,994 (7.9)                          | 0.148                               |

|                                                                   |                  |                  |       |
|-------------------------------------------------------------------|------------------|------------------|-------|
| Hypertension                                                      | 536,794 (17.2)   | 150,564 (10.0)   | 0.211 |
| Obesity                                                           | 873,059 (28.0)   | 271,383 (18.1)   | 0.238 |
| Type 2 diabetes                                                   | 239,653 (7.7)    | 77,352 (5.1)     | 0.104 |
| <b>Cancer status</b>                                              |                  |                  | 0.064 |
| Without a prior diagnosis of cancer                               | 2,925,498 (93.9) | 1,432,212 (95.3) |       |
| With a prior diagnosis of cancer, by years since cancer diagnosis |                  |                  |       |
| >5 years                                                          | 121,949 (3.9)    | 45,104 (3.0)     |       |
| 1-5 years                                                         | 53,026 (1.7)     | 19,007 (1.3)     |       |
| < 1 year                                                          | 15,462 (0.5)     | 6,119 (0.4)      |       |
| <b>Age at cancer diagnosis, median [IQR]</b>                      | 61 [50.5, 70.0]  | 61 [49.7, 70.9]  | 0.007 |
| <b>Cancer type [ICD-10-CM code] (%)</b>                           |                  |                  |       |
| <b>Haematological</b>                                             | 15,640 (0.5)     | 5,997 (0.4)      | 0.015 |
| Leukaemia [C91-C95]                                               | 3,717 (0.1)      | 1,394 (0.1)      | 0.008 |
| Non-Hodgkin lymphoma [C82-C96]                                    | 5,317 (0.2)      | 2,085 (0.1)      | 0.008 |
| Hodgkin's lymphoma [C81]                                          | 1,643 (0.1)      | 606 (0.0)        | 0.006 |
| Multiple myeloma [C90]                                            | 1,940 (0.1)      | 784 (0.1)        | 0.004 |
| Other haematological [C96]                                        | 3,023 (0.1)      | 1,128 (0.1)      | 0.007 |
| <b>Solid</b>                                                      | 174,797 (5.6)    | 64,233 (4.3)     | 0.062 |
| Breast [C50]                                                      | 41,834 (1.3)     | 16,777 (1.1)     | 0.021 |
| Prostate [C61]                                                    | 28,396 (0.9)     | 8,745 (0.6)      | 0.038 |
| Colorectal [C18-C21]                                              | 26,299 (0.8)     | 9,772 (0.7)      | 0.022 |
| Bladder [C67]                                                     | 15,570 (0.5)     | 5,022 (0.3)      | 0.026 |
| Melanoma [C43]                                                    | 5,804 (0.2)      | 1,765 (0.1)      | 0.018 |
| Kidney [C64]                                                      | 5,248 (0.2)      | 2,105 (0.1)      | 0.007 |
| Lung [C33-C34]                                                    | 5,749 (0.2)      | 2,162 (0.1)      | 0.010 |
| Corpus uterus [C54-C55]                                           | 9,296 (0.3)      | 3,660 (0.2)      | 0.011 |
| Thyroid [C73]                                                     | 4,756 (0.2)      | 1,693 (0.1)      | 0.011 |
| Head and neck [C00-C14]                                           | 4,136 (0.1)      | 1,634 (0.1)      | 0.007 |
| Cervix [C53]                                                      | 2,387 (0.1)      | 926 (0.1)        | 0.006 |
| Ovary [C56]                                                       | 2,623 (0.1)      | 1,005 (0.1)      | 0.006 |
| Stomach [C16]                                                     | 2,734 (0.1)      | 1,155 (0.1)      | 0.004 |
| Larynx [C32]                                                      | 2,564 (0.1)      | 753 (0.1)        | 0.013 |

|                                                         |             |              |       |
|---------------------------------------------------------|-------------|--------------|-------|
| Brain and Central Nervous System [C70-C72, C75.1-C75.3] | 1,462 (0.0) | 589 (0.0)    | 0.004 |
| Testis [C62]                                            | 2,859 (0.1) | 1,120 (0.1)  | 0.006 |
| Liver [C22]                                             | 1,144 (0.0) | 478 (0.0)    | 0.003 |
| Bone and cartilage [C40-C41]                            | 581 (0.0)   | 182 (0.0)    | 0.005 |
| Pancreas [C25]                                          | 341 (0.0)   | 138 (0.0)    | 0.002 |
| Oesophagus [C15]                                        | 1,891 (0.1) | 872 (0.1)    | 0.001 |
| Gallbladder [C23-C24]                                   | 1,441 (0.0) | 503 (0.0)    | 0.006 |
| Other solid cancers                                     | 7,682 (0.2) | 1,104 (0.02) | 0.004 |

Notes: The MEDEA deprivation index is calculated at the census tract level in urban areas. Other solid cancers include other solid cancers, cancers of unspecified site [C76, C80] and more than one cancer (i.e. patients that had more than one cancer recorded on the same date). Abbreviations: IQR, interquartile range; ICD-10-CM, International Classification for Diseases, 10<sup>th</sup> revision Clinical Modification, MEDEA: MEDEA deprivation index.

## Supplementary figures

Figure S1. Directed Acyclic Graph used to adjust the Cox proportional hazard models to assess the relationship between cancer and COVID-19 outcomes

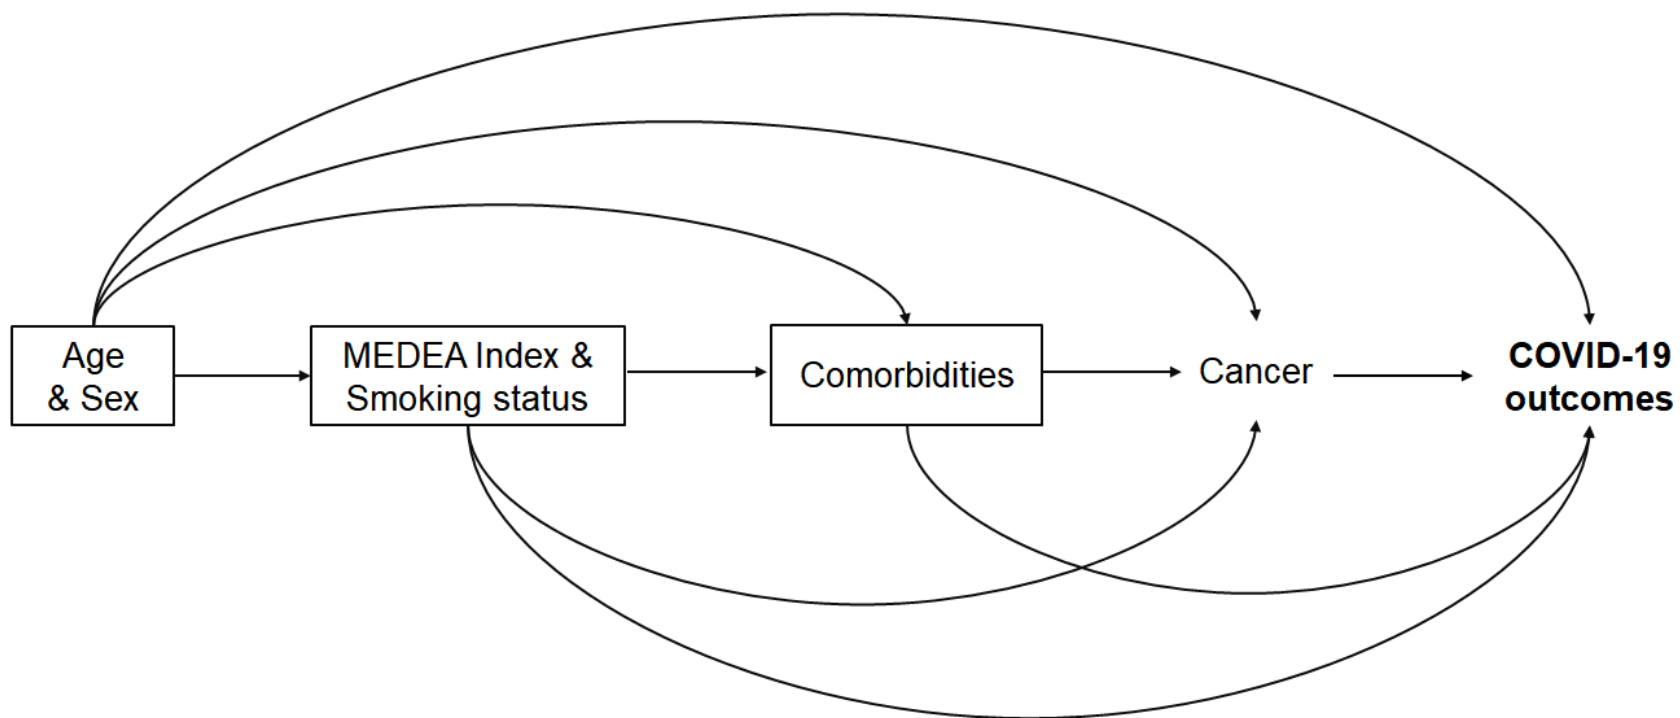

Notes: MEDEA is an index of deprivation calculated at the census tract level in urban areas. The comorbidities considered are autoimmune conditions, chronic kidney disease, chronic obstructive pulmonary disease, dementia, heart disease, hyperlipidaemia, hypertension, obesity, and type 2 diabetes.

Figure S2. Flowchart with the inclusion and exclusion criteria of the study population

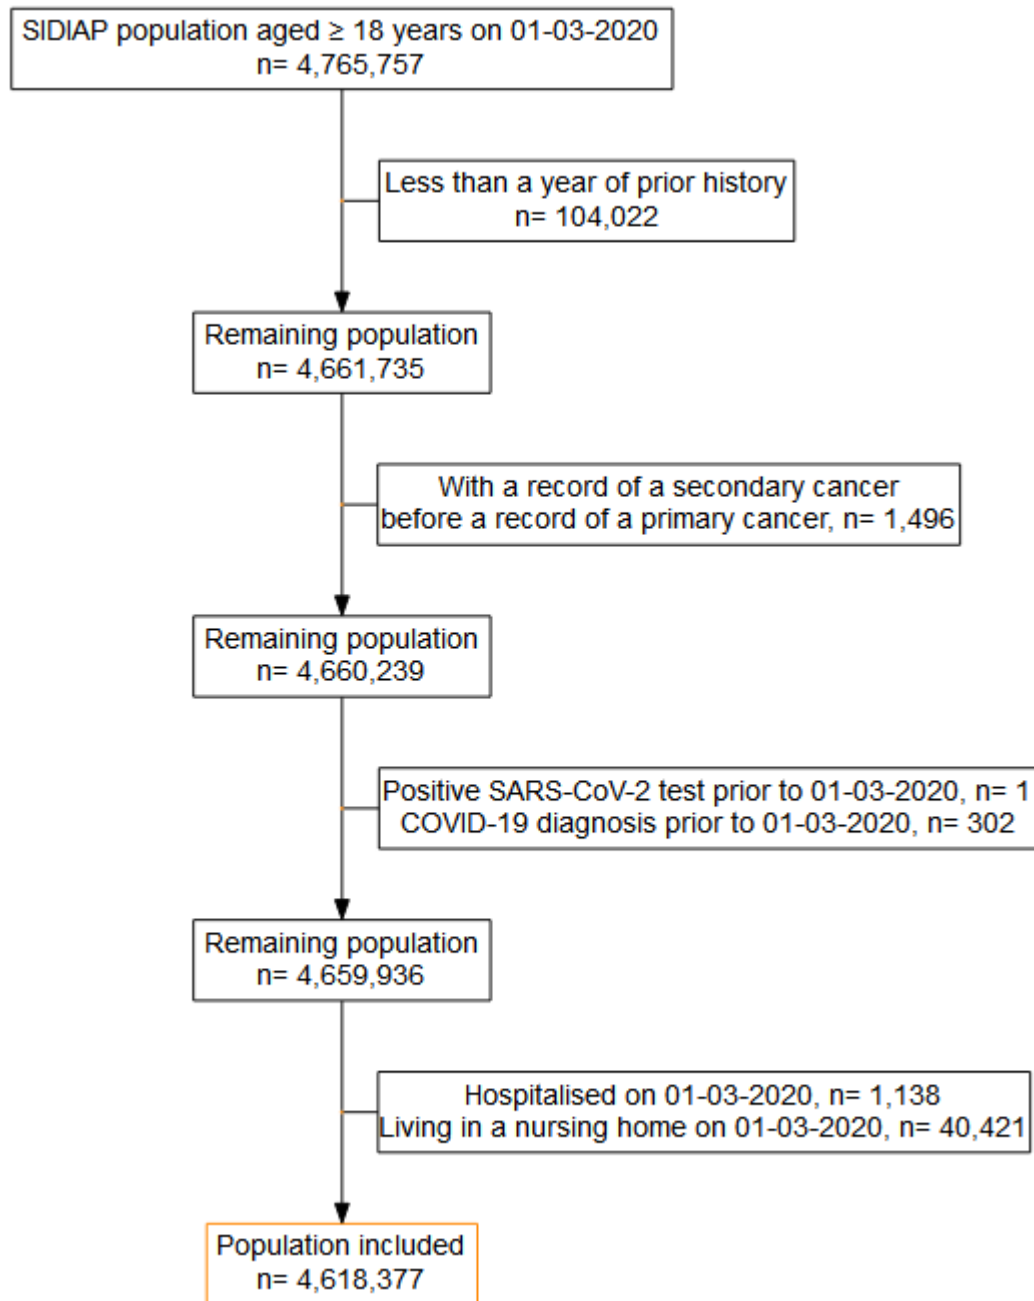

Abbreviations: SIDIAP: Information System for Research in Primary Care; SARS-CoV-2: Severe Acute Respiratory Syndrome Coronavirus 2



**Figure S3. Prevalence of comorbidities among the general population, by age and cancer status**

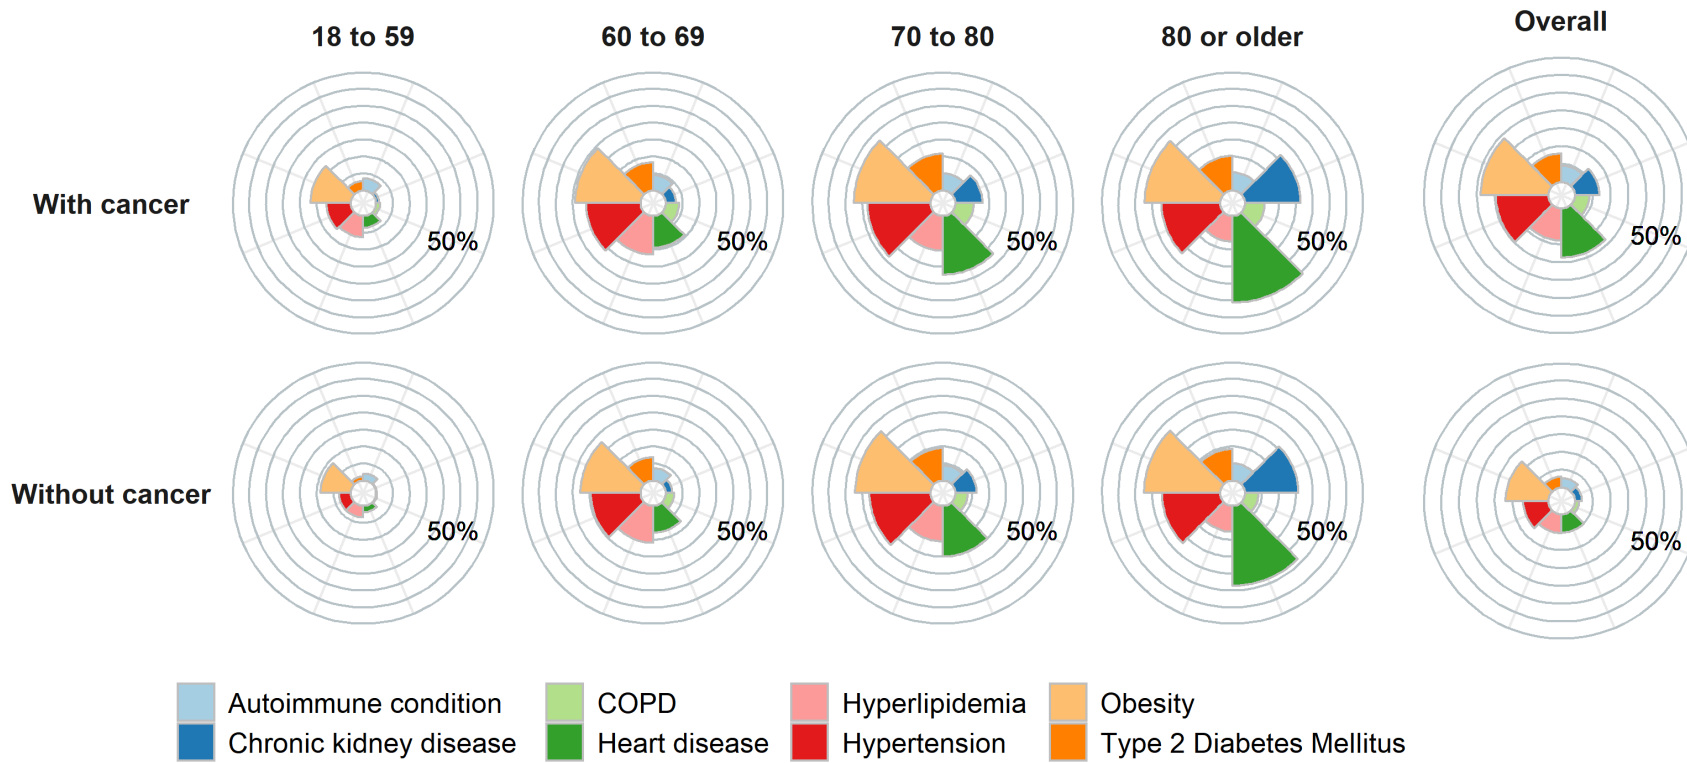

Abbreviations: COPD, Chronic Obstructive Pulmonary Disease

**Figure S4. Hazard Ratios of COVID-19 outcomes in patients with cancer compared to patients without cancer, using different adjustment strategies.**

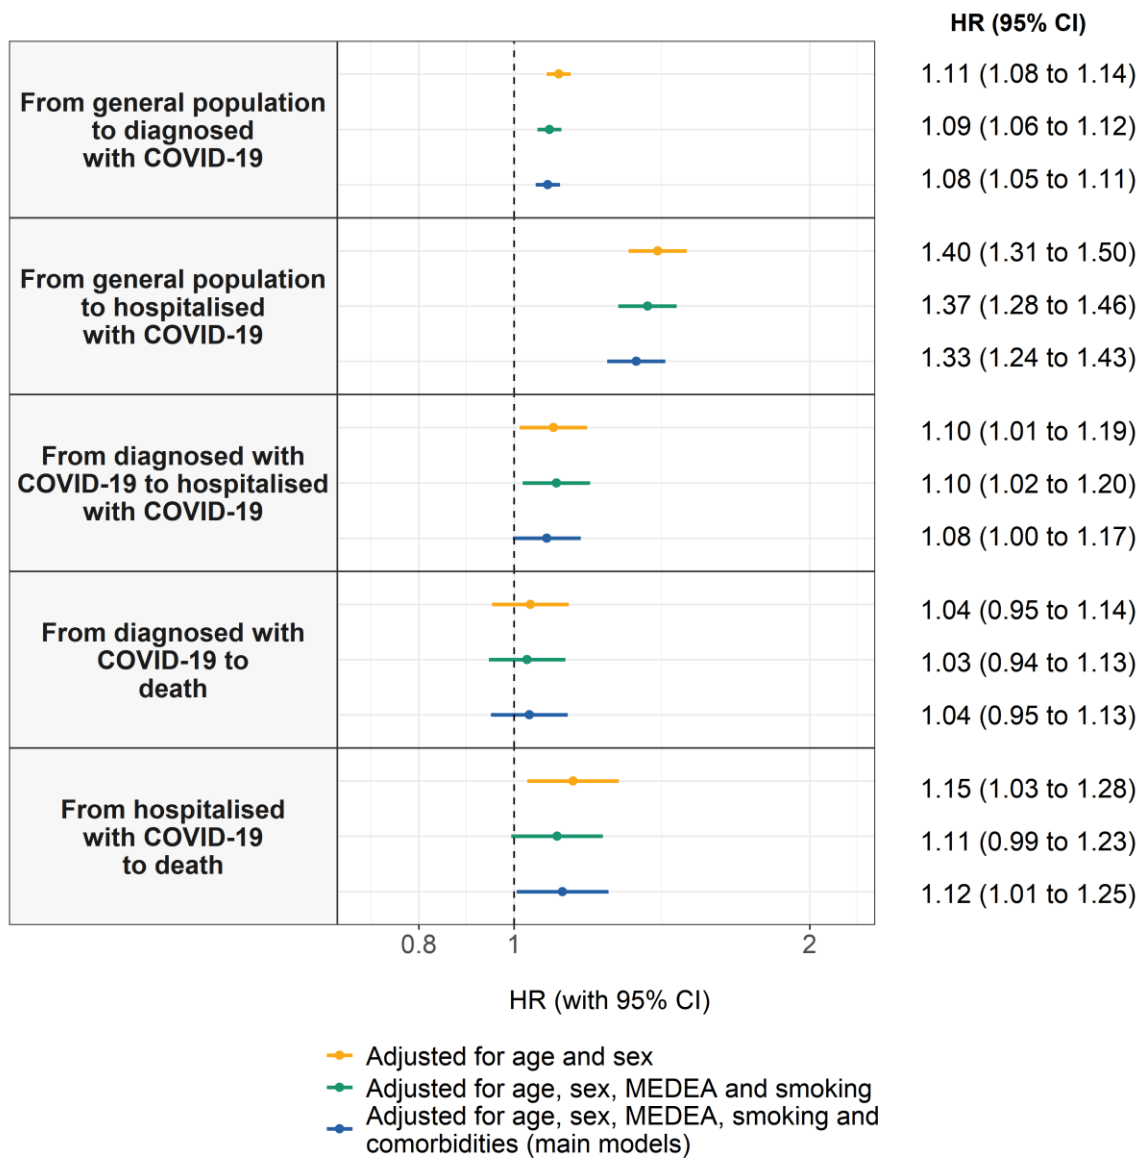

Notes: The comorbidities included are autoimmune conditions, chronic kidney disease, chronic obstructive pulmonary disease, dementia, heart disease, hyperlipidaemia, hypertension, type 2 diabetes, and obesity. Abbreviations: HR, Hazard Ratio; CI, Confidence Interval, MEDEA: MEDEA deprivation index.

Figure S5. Log-log plots for risk of having an outpatient COVID-19 diagnosis, for age categories (A) and for cancer status by years since cancer diagnosis (B)

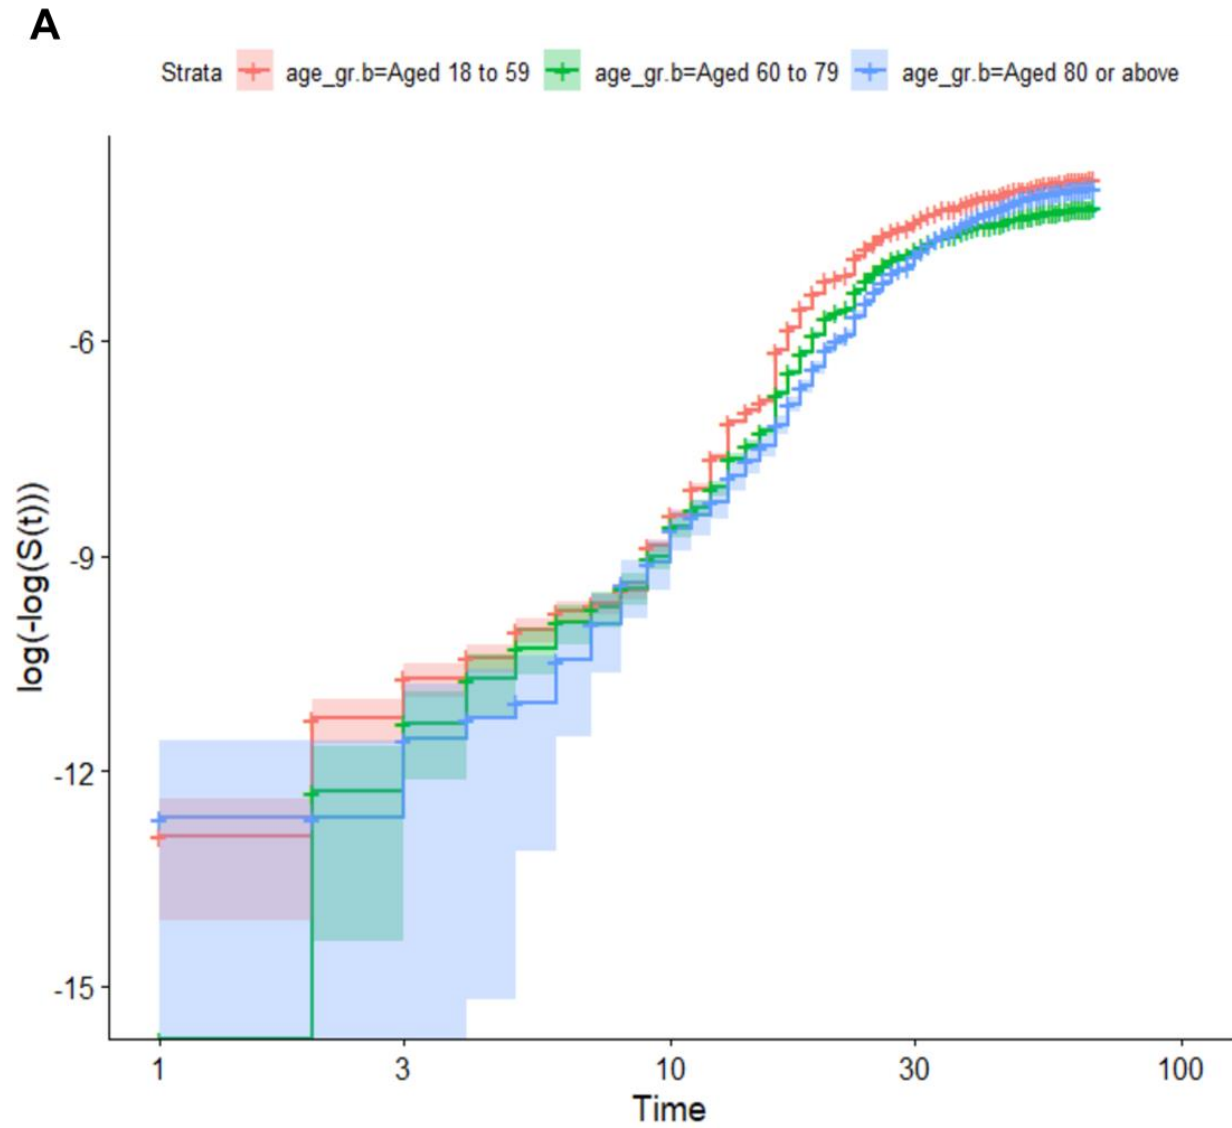

**B**

+

 c\_status=cancer-free    + c\_status=>5years    + c\_status=1-5 years    + c\_status=< 1 year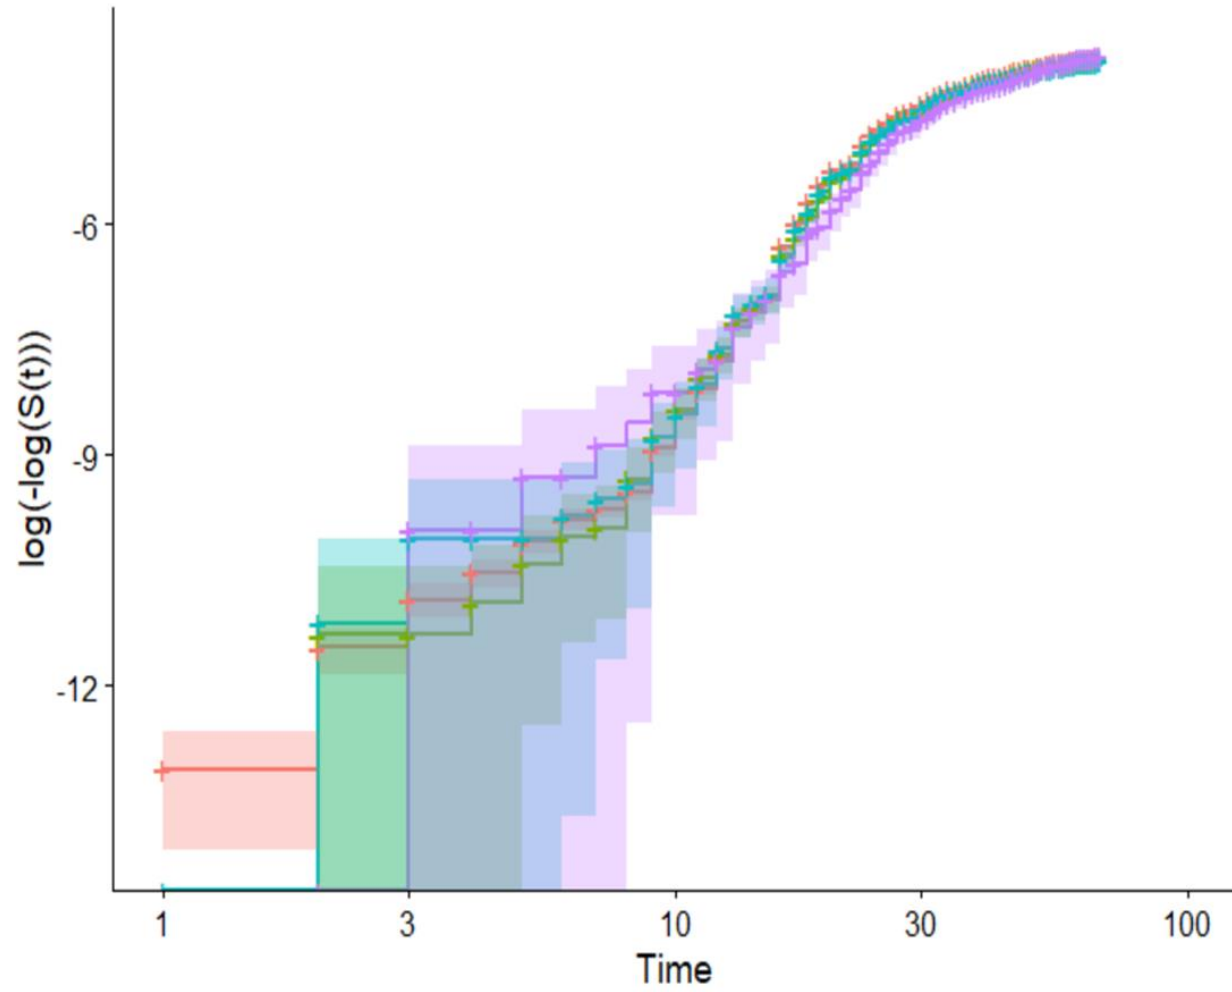

**Figure S6. Adjusted Hazard Ratios for having an outpatient COVID-19 diagnosis in patients with cancer (overall and by years since the cancer diagnosis) compared to patients without cancer, stratified by month**

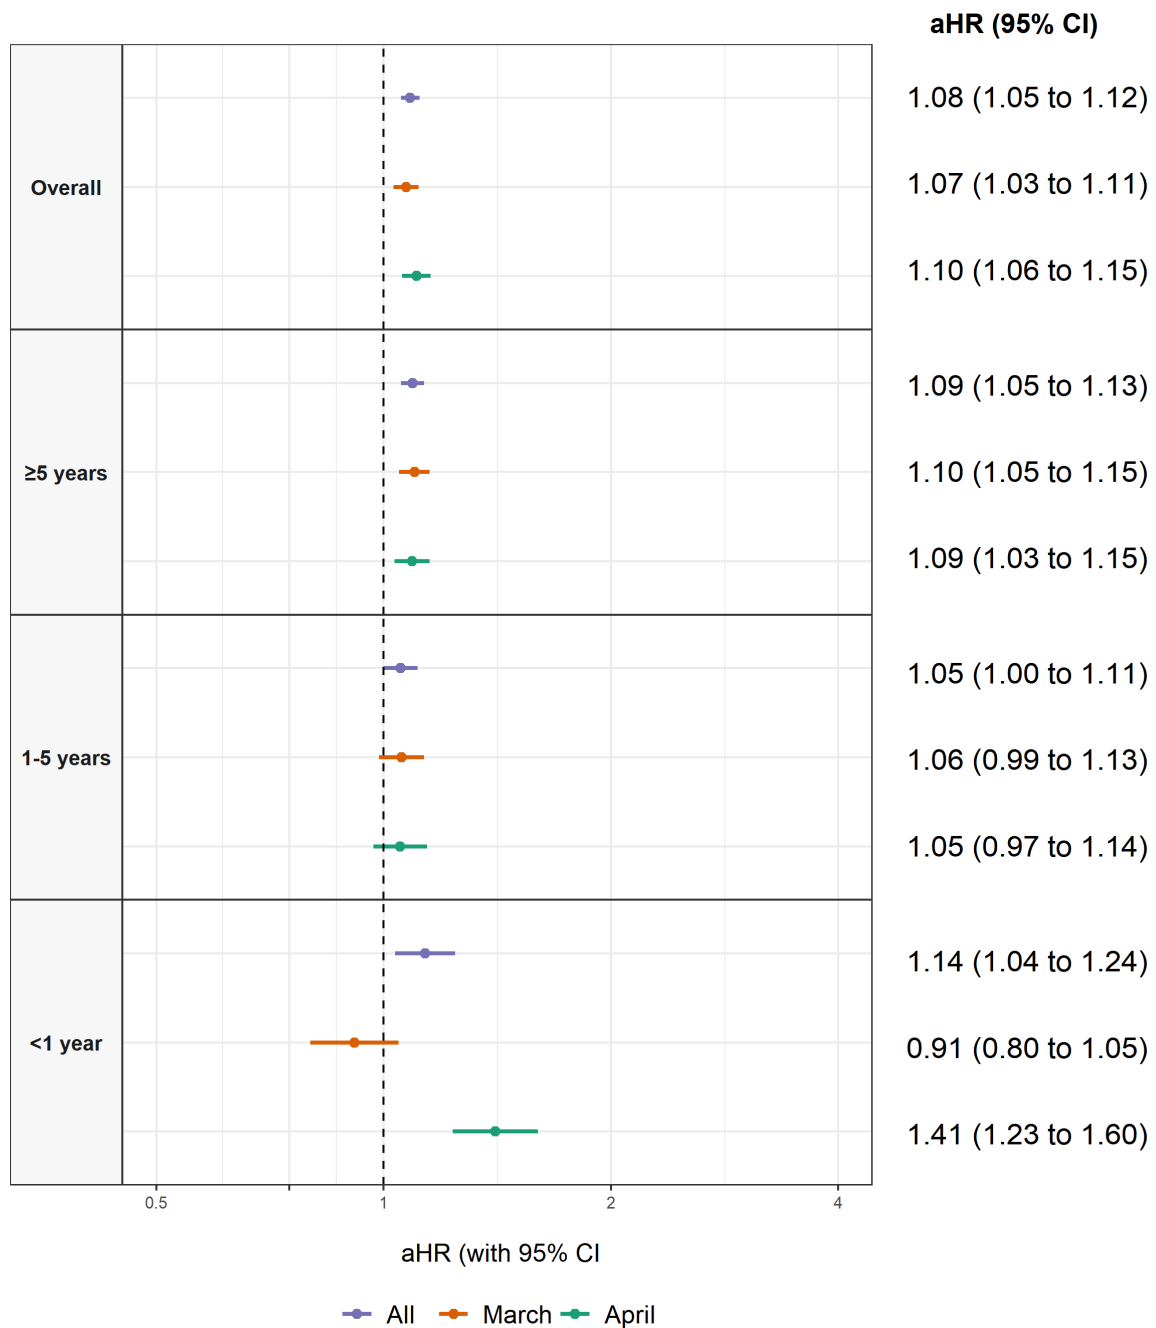

Notes: Models are adjusted for sex, age, the MEDEA deprivation Index, and comorbidities (autoimmune conditions, chronic kidney disease, chronic obstructive pulmonary disease, dementia, heart disease, hyperlipidaemia, hypertension, type 2 diabetes, and obesity). Abbreviations: aHR, adjusted Hazard Ratio; CI, Confidence Interval

**Figure S7. Adjusted Hazard Ratios of COVID-19 outcomes in patients with cancer compared to patients without cancer, by population included (all and restricting participants to never smokers)**

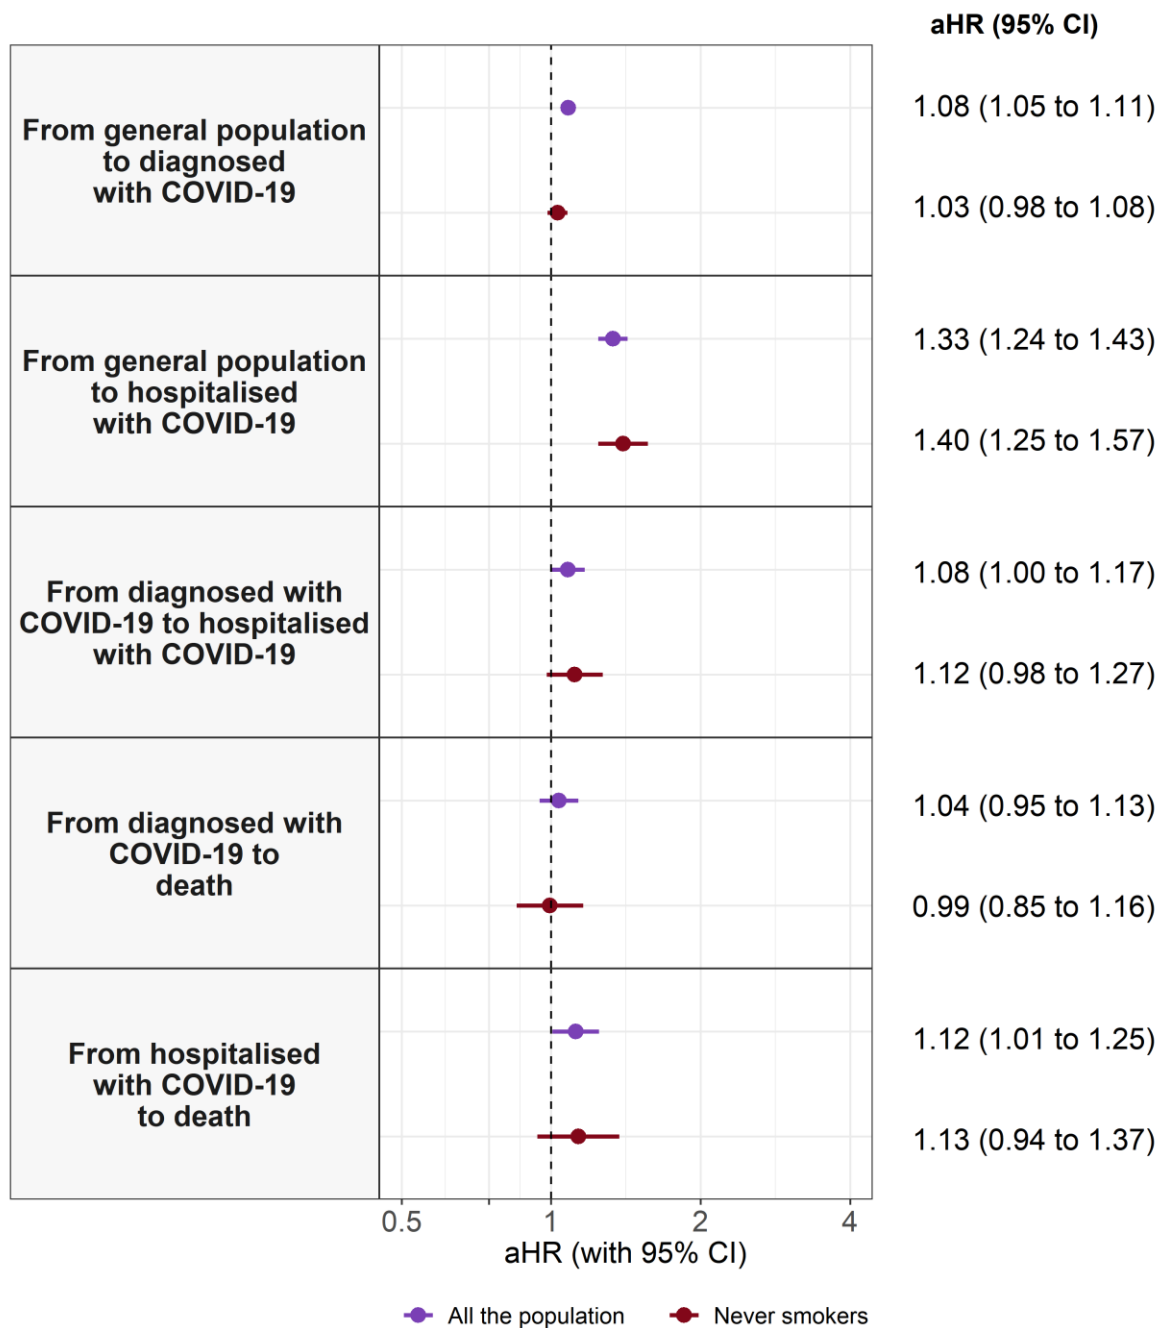

Notes: Models are adjusted for sex, age, the MEDEA deprivation Index, and comorbidities (autoimmune conditions, chronic kidney disease, chronic obstructive pulmonary disease, dementia, heart disease, hyperlipidaemia, hypertension, type 2 diabetes, and obesity). Models including all the population are also adjusted for smoking status. Abbreviations: aHR, adjusted Hazard Ratio; CI, Confidence Interval

**Figure S8. Adjusted Hazard Ratios of COVID-19 outcomes in patients with cancer compared to patients without cancer, after multiple imputation of missing data on the MEDEA deprivation index and/or smoking status**

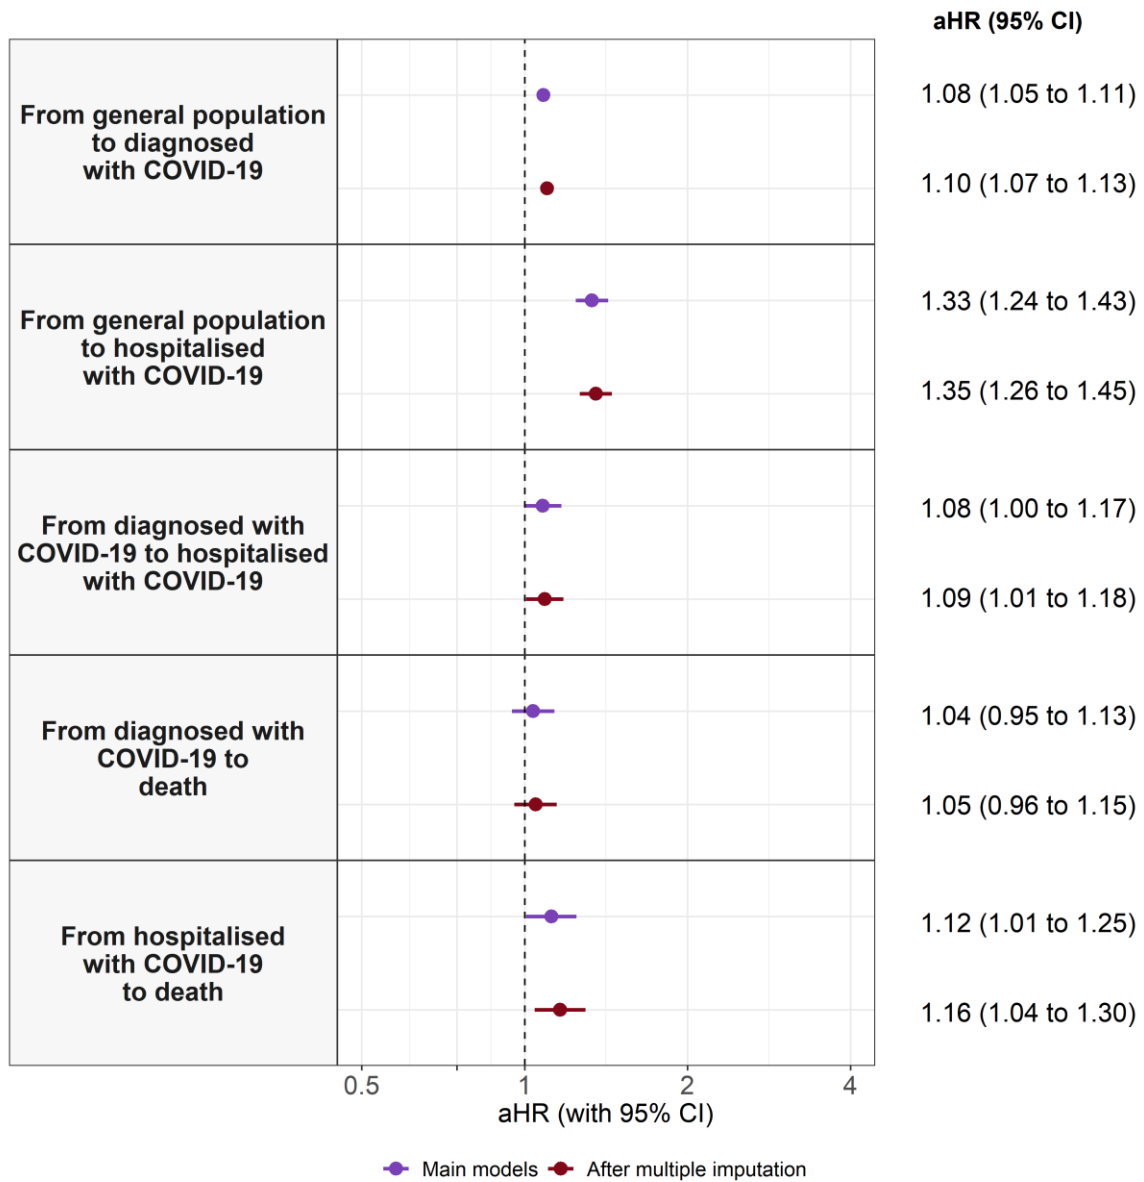

Notes: Models are adjusted for sex, age, the MEDEA deprivation Index, smoking status, and comorbidities (autoimmune conditions, chronic kidney disease, chronic obstructive pulmonary disease, dementia, heart disease, hyperlipidaemia, hypertension, type 2 diabetes, and obesity). Abbreviations: aHR, adjusted Hazard Ratio; CI, Confidence Interval
